# Supplementary material
Source: Springer Nature journal article supplement (https://www.springermedizin.de/resource/supplementary/12889_2012_5945_MOESM1_ESM.pdf/9496548)
Supplement: MOESM1 [file 9496548]

## HLS-EU-Q47

© HLS-EU Consortium

| Item no. | Relation to HLS-EU matrix                  | <i>On a scale from very easy to very difficult, how easy would you say it is to: ...</i>                                | 1<br>Very difficult | 2<br>Difficult | 3<br>Easy | 4<br>Very easy | 5<br>(Don't know - to be used by interviewer only) |
|----------|--------------------------------------------|-------------------------------------------------------------------------------------------------------------------------|---------------------|----------------|-----------|----------------|----------------------------------------------------|
| 1        | Healthcare/ Access information             | find information about symptoms of illnesses that concern you?                                                          |                     |                |           |                |                                                    |
| 2        | Healthcare/ Access information             | find information on treatments of illnesses that concern you?                                                           |                     |                |           |                |                                                    |
| 3        | Healthcare/ Access information             | find out what to do in case of a medical emergency?                                                                     |                     |                |           |                |                                                    |
| 4        | Healthcare/ Access information             | find out where to get professional help when you are ill?                                                               |                     |                |           |                |                                                    |
| 5        | Healthcare/ Understand information         | understand what your doctor says to you?                                                                                |                     |                |           |                |                                                    |
| 6        | Healthcare/ Understand information         | understand the leaflets that come with your medicine?                                                                   |                     |                |           |                |                                                    |
| 7        | Healthcare/ Understand information         | understand what to do in a medical emergency?                                                                           |                     |                |           |                |                                                    |
| 8        | Healthcare/ Understand information         | understand your doctor's or pharmacist's instruction on how to take a prescribed medicine?                              |                     |                |           |                |                                                    |
| 9        | Healthcare/ Appraise information           | judge how information from your doctor applies to you?                                                                  |                     |                |           |                |                                                    |
| 10       | Healthcare/ Appraise information           | judge the advantages and disadvantages of different treatment options?                                                  |                     |                |           |                |                                                    |
| 11       | Healthcare/ Appraise information           | judge when you may need to get a second opinion from another doctor?                                                    |                     |                |           |                |                                                    |
| 12       | Healthcare/ Appraise information           | judge if the information about illness in the media is reliable?                                                        |                     |                |           |                |                                                    |
| 13       | Healthcare/ Apply information              | use information the doctor gives you to make decisions about your illness?                                              |                     |                |           |                |                                                    |
| 14       | Healthcare/ Apply information              | follow the instructions on medication?                                                                                  |                     |                |           |                |                                                    |
| 15       | Healthcare/ Apply information              | call an ambulance in an emergency?                                                                                      |                     |                |           |                |                                                    |
| 16       | Healthcare/ Apply information              | follow instructions from your doctor or pharmacist?                                                                     |                     |                |           |                |                                                    |
| 17       | Disease prevention/ Access information     | find information about how to manage unhealthy behaviour such as smoking, low physical activity and drinking too much?  |                     |                |           |                |                                                    |
| 18       | Disease prevention/ Access information     | find information on how to manage mental health problems like stress or depression?                                     |                     |                |           |                |                                                    |
| 19       | Disease prevention/ Access information     | find information about vaccinations and health screenings that you should have?                                         |                     |                |           |                |                                                    |
| 20       | Disease prevention/ Access information     | find information on how to prevent or manage conditions like being overweight, high blood pressure or high cholesterol? |                     |                |           |                |                                                    |
| 21       | Disease prevention/ Understand information | understand health warnings about behaviour such as smoking, low physical activity and drinking too much?                |                     |                |           |                |                                                    |
| 22       | Disease prevention/ Understand information | understand why you need vaccinations?                                                                                   |                     |                |           |                |                                                    |
| 23       | Disease prevention/ Understand information | understand why you need health screenings?                                                                              |                     |                |           |                |                                                    |
| 24       | Disease prevention/ Appraise information   | judge how reliable health warnings are, such as smoking, low physical activity and drinking too much?                   |                     |                |           |                |                                                    |

**Annex: The HLS-EU-Q47 of the HLS-EU Consortium for the European Health Literacy Survey (HLS-EU)**

|          |                                             |                                                                                           | 1              | 2         | 3    | 4         | 5                                             |
|----------|---------------------------------------------|-------------------------------------------------------------------------------------------|----------------|-----------|------|-----------|-----------------------------------------------|
|          |                                             |                                                                                           | Very difficult | Difficult | Easy | Very easy | (Don't know - to be used by interviewer only) |
| 25       | Disease prevention/<br>Appraise information | judge when you need to go to a doctor for a check-up?                                     |                |           |      |           |                                               |
| Item no. | Relation to HLS-EU matrix                   | <i>On a scale from very easy to very difficult, how easy would you say it is to: ...</i>  |                |           |      |           |                                               |
| 26       | Disease prevention/<br>Appraise information | judge which vaccinations you may need?                                                    |                |           |      |           |                                               |
| 27       | Disease prevention/<br>Appraise information | judge which health screenings you should have?                                            |                |           |      |           |                                               |
| 28       | Disease prevention/<br>Appraise information | judge if the information on health risks in the media is reliable?                        |                |           |      |           |                                               |
| 29       | Disease prevention/<br>Apply information    | decide if you should have a flu vaccination?                                              |                |           |      |           |                                               |
| 30       | Disease prevention/<br>Apply information    | decide how you can protect yourself from illness based on advice from family and friends? |                |           |      |           |                                               |
| 31       | Disease prevention/<br>Apply information    | decide how you can protect yourself from illness based on information in the media?       |                |           |      |           |                                               |
| 32       | Health promotion/<br>Access information     | find information on healthy activities such as exercise, healthy food and nutrition?      |                |           |      |           |                                               |
| 33       | Health promotion/<br>Access information     | find out about activities that are good for your mental well-being?                       |                |           |      |           |                                               |
| 34       | Health promotion/<br>Access information     | find information on how your neighbourhood could be more health-friendly?                 |                |           |      |           |                                               |
| 35       | Health promotion/<br>Access information     | find out about political changes that may affect health?                                  |                |           |      |           |                                               |
| 36       | Health promotion/<br>Access information     | find out about efforts to promote your health at work?                                    |                |           |      |           |                                               |
| 37       | Health promotion/<br>Understand information | understand advice on health from family members or friends?                               |                |           |      |           |                                               |
| 38       | Health promotion/<br>Understand information | understand information on food packaging?                                                 |                |           |      |           |                                               |
| 39       | Health promotion/<br>Understand information | understand information in the media on how to get healthier?                              |                |           |      |           |                                               |
| 40       | Health promotion/<br>Understand information | understand information on how to keep your mind healthy?                                  |                |           |      |           |                                               |
| 41       | Health promotion/<br>Appraise information   | judge where your life affects your health and well-being?                                 |                |           |      |           |                                               |
| 42       | Health promotion/<br>Appraise information   | judge how your housing conditions help you to stay healthy?                               |                |           |      |           |                                               |
| 43       | Health promotion/<br>Appraise information   | judge which everyday behaviour is related to your health?                                 |                |           |      |           |                                               |
| 44       | Health promotion/<br>Apply information      | make decisions to improve your health?                                                    |                |           |      |           |                                               |
| 45       | Health promotion/<br>Apply information      | join a sports club or exercise class if you want to?                                      |                |           |      |           |                                               |
| 46       | Health promotion/<br>Apply information      | influence your living conditions that affect your health and wellbeing?                   |                |           |      |           |                                               |
| 47       | Health promotion/<br>Apply information      | take part in activities that improve health and well-being in your community?             |                |           |      |           |                                               |
